# Supplementary material for: The Association between Influenza Vaccination and COVID-19 and Its Outcomes: A Systematic Review and Meta-Analysis of Observational Studies
Source: MDPI journal article supplement (doi:10.3390/vaccines9050529), 2021-05-20
Supplement: s1 [file s1]

**Supplementary Table 1. Summary of the overall association between influenza vaccination and SARS-CoV-2 infection and clinical outcomes by crude OR**

| Outcomes             | Number of studies | I <sup>2</sup> value (%) | P value | Crude OR (95%CI)   |                     |
|----------------------|-------------------|--------------------------|---------|--------------------|---------------------|
|                      |                   |                          |         | Fixed effect model | Random effect model |
| SARS-CoV-2 infection | 9                 | 41.1                     | 0.09    | 1.00 (0.96-1.04)   | 0.99 (0.78-1.25)    |
| Intensive care       | 2                 | 68.2                     | 0.08    | 0.55 (0.34-0.87)   | 0.57 (0.20-1.62)    |
| Hospitalization      | 3                 | 87.6                     | <0.01   | 1.21 (1.11-1.33)   | 0.83 (0.37-1.84)    |
| Mortality            | 3                 | 82.5                     | <0.01   | 1.13 (0.98-1.30)   | 1.13 (0.98-1.30)    |

**Supplementary Table 2. Subgroup analyses of the association between influenza vaccination and SARS-CoV-2 infection by crude OR**

| Grouping variables | No. of studies | Crude OR (95%CI)    | I <sup>2</sup> value (%) | P value            | Crude OR (95%CI)    | I <sup>2</sup> value (%) | P value            |
|--------------------|----------------|---------------------|--------------------------|--------------------|---------------------|--------------------------|--------------------|
| <b>Region</b>      | 12             |                     |                          | <0.01 <sup>a</sup> |                     |                          | <0.01 <sup>a</sup> |
| Europe             | 7              | 1.27<br>(1.20-1.34) | 93.2                     | <0.01 <sup>b</sup> | 1.37<br>(1.07-1.75) | 93.2                     | <0.01 <sup>b</sup> |

|                             |    |                     |      |                    |                     |      |                    |
|-----------------------------|----|---------------------|------|--------------------|---------------------|------|--------------------|
| Asia                        | 2  | 0.52<br>(0.46-0.60) | 94.5 | <0.01 <sup>b</sup> | 0.16<br>(0.01-2.13) | 94.5 | <0.01 <sup>b</sup> |
| America                     | 3  | 0.80<br>(0.75-0.86) | 13.1 | 0.32 <sup>b</sup>  | 0.80<br>(0.74-0.87) | 13.1 | 0.32 <sup>b</sup>  |
| <b>Sample size</b>          | 12 |                     |      | 0.85 <sup>a</sup>  |                     |      | 0.85 <sup>a</sup>  |
| Sample size <10000          | 5  | 1.03<br>(0.94-1.14) | 90.6 | <0.01 <sup>b</sup> | 0.89<br>(0.58-1.36) | 90.6 | <0.01 <sup>b</sup> |
| 10000<=sample<br>size<20000 | 3  | 1.13<br>(1.06-1.20) | 95.4 | <0.01 <sup>b</sup> | 1.03<br>(0.72-1.48) | 95.4 | <0.01 <sup>b</sup> |
| Sample<br>size >=20000      | 4  | 0.85<br>(0.80-0.91) | 98.3 | <0.01 <sup>b</sup> | 1.03<br>(0.60-1.77) | 98.3 | <0.01 <sup>b</sup> |
| <b>Study design</b>         |    |                     |      | <0.01 <sup>a</sup> |                     |      | 0.23 <sup>a</sup>  |
| Case-control study          | 3  | 1.21<br>(1.13-1.30) | 93.7 | <0.01 <sup>b</sup> | 0.64<br>(0.30-1.37) | 93.7 | <0.01 <sup>b</sup> |
| Cross-sectional<br>study    | 3  | 0.77<br>(0.71-1.84) | 94.8 | <0.01 <sup>b</sup> | 0.79<br>(0.51-1.24) | 94.8 | <0.01 <sup>b</sup> |
| Cohort study                | 6  | 0.98<br>(0.93-1.05) | 96.9 | <0.01 <sup>b</sup> | 1.18<br>(0.81-1.71) | 96.9 | <0.01 <sup>b</sup> |

a: P value for subgroup difference.

b: P value for heterogeneity.

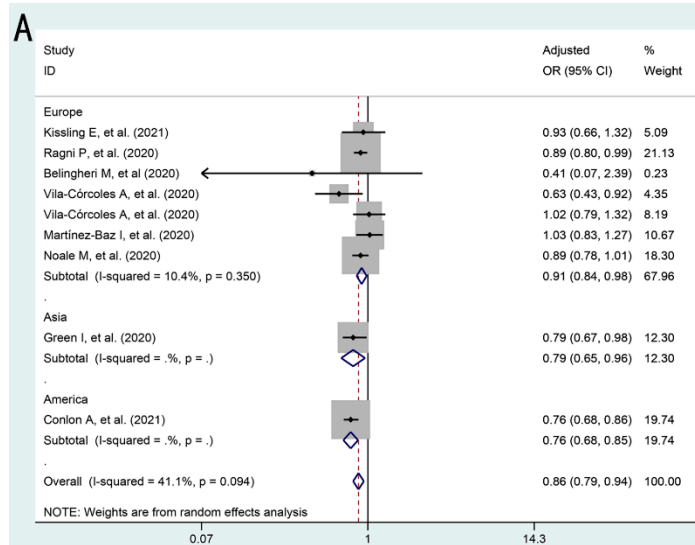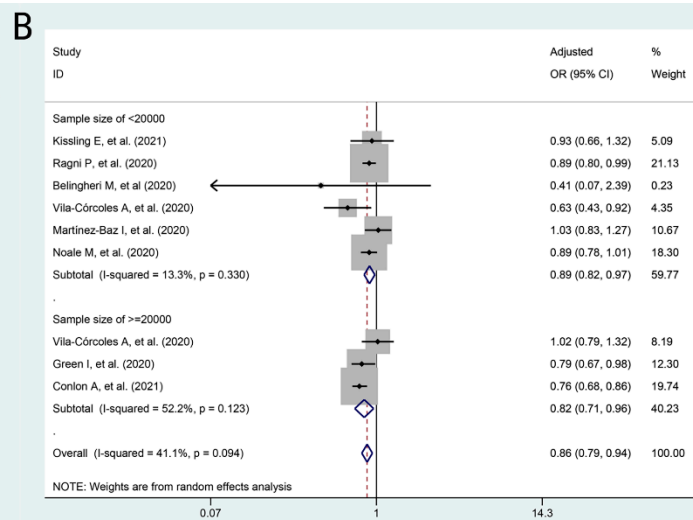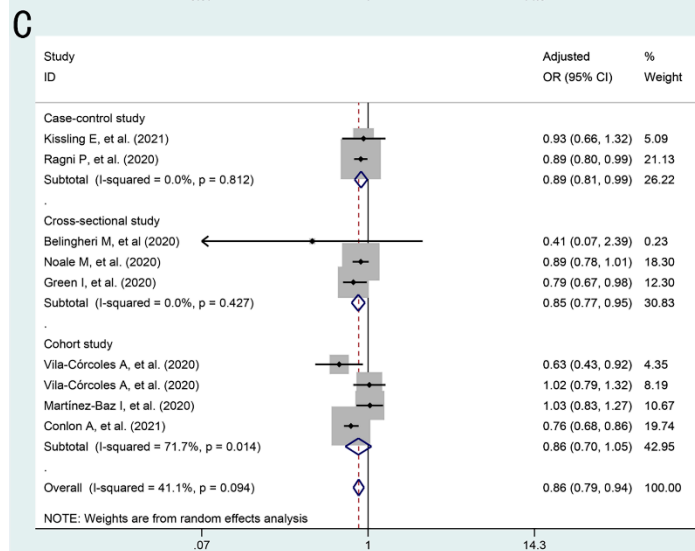

**Supplementary Figure 1: Forest plots for subgroup analysis on the association between influenza vaccination and SARS-CoV-2 infection by random effects model: (A) stratified by region (B) stratified by sample size (C) stratified by study design.**
